# Supplementary material for: Protein-Mediated and RNA-Based Origins of Replication of Extrachromosomal Mycobacterial Prophages
Source: PubMed Central journal article supplement (PMC7157519; doi:10.1128/mbio.00385-20), 2020-03-24
Supplement: mBio.00385-20-sf001.pdf [file mBio.00385-20-sf001.pdf]

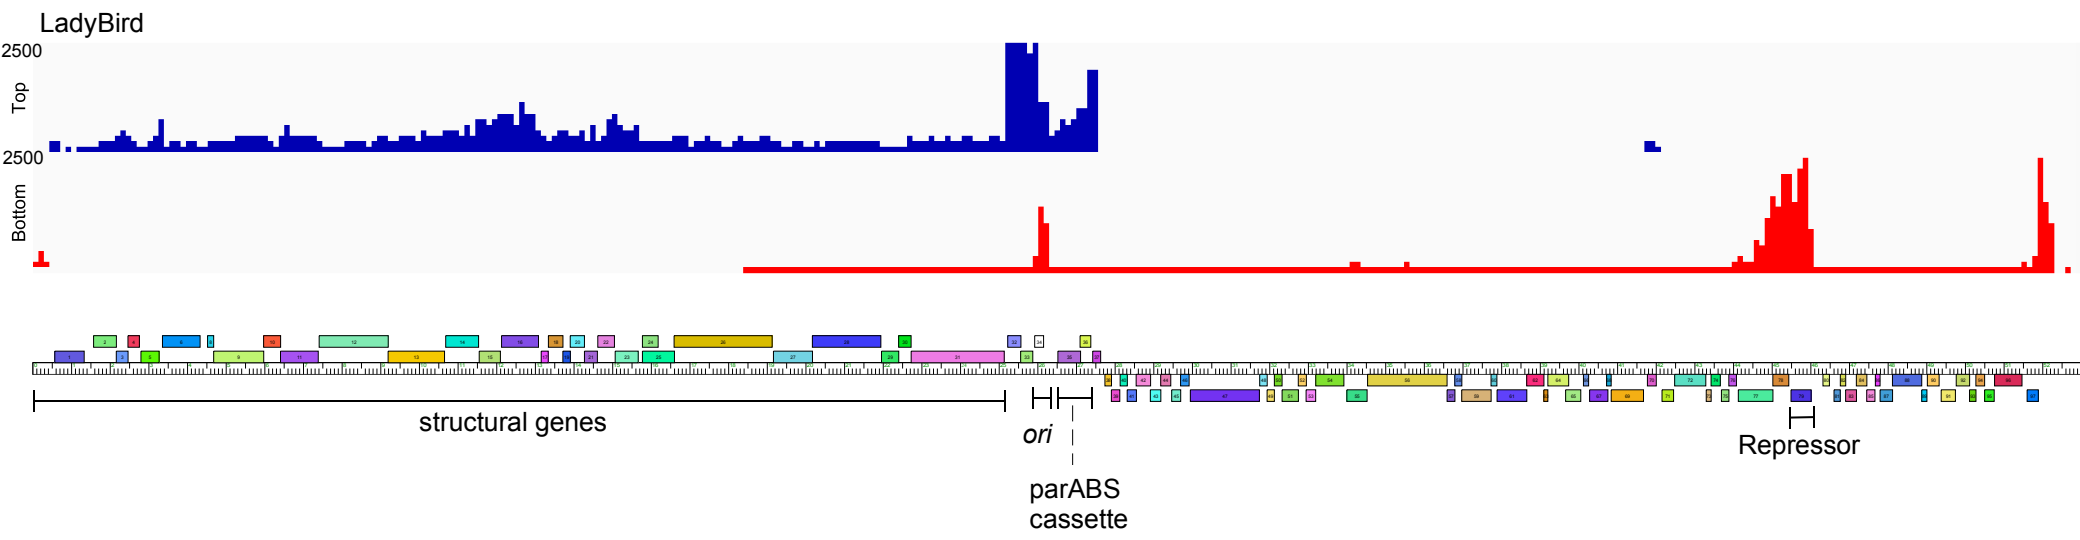

Figure S1
