# Supplementary material for: Protein-Mediated and RNA-Based Origins of Replication of Extrachromosomal Mycobacterial Prophages
Source: PubMed Central journal article supplement (PMC7157519; doi:10.1128/mbio.00385-20), 2020-03-24
Supplement: mBio.00385-20-sf003.pdf [file mBio.00385-20-sf003.pdf]

**A**LadyBird  
G24044ALadyBird  $\Delta$ ori  
G24044A  
C24885ALadyBird  $\Delta$ ori  
G24044A  
G24980A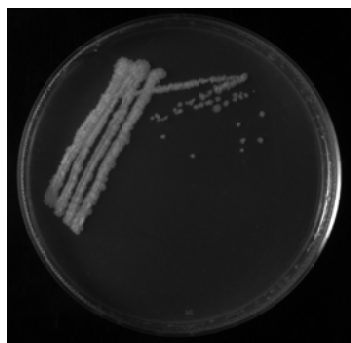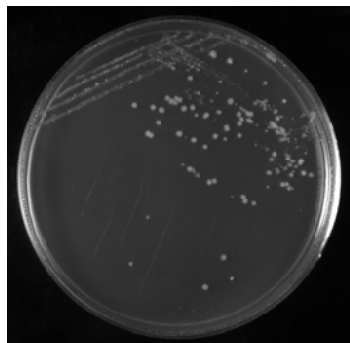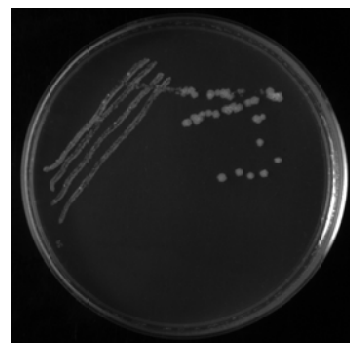**B**Phage  
Streak 1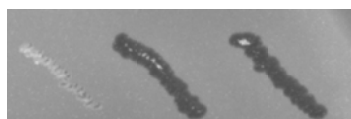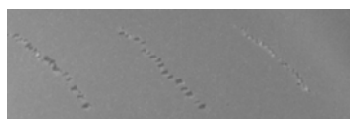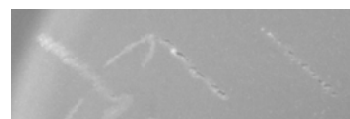Phage  
Streak 2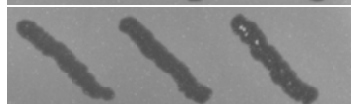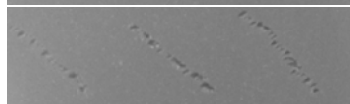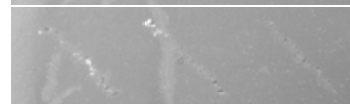Phage  
Streak 3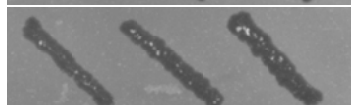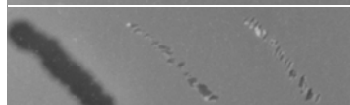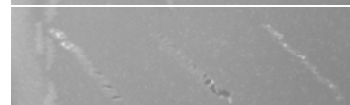Phage Buffer  
Streak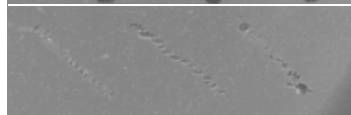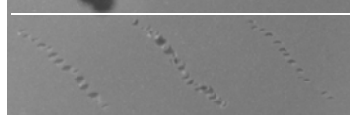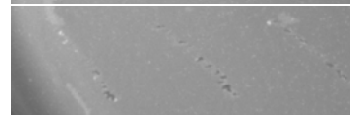Phage  
Streak 1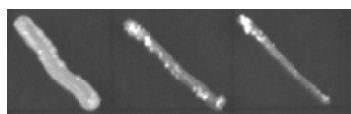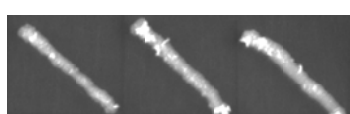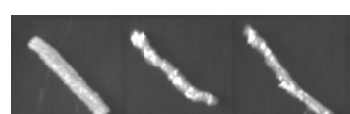Phage  
Streak 2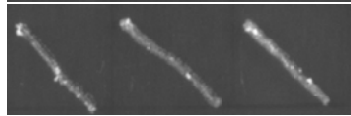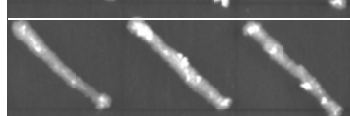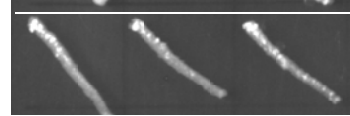Phage  
Streak 3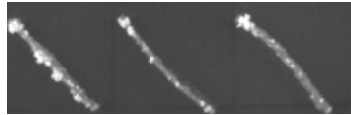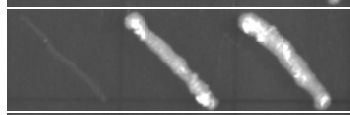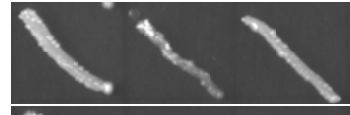Phage Buffer  
Streak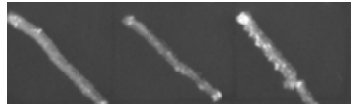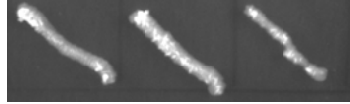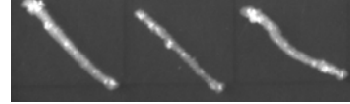

Figure S3
